# Supplementary material for: 3D printed modules for integrated microfluidic devices
Source: Royal Society of Chemistry journal article supplement (doi:10.1039/c4ra05072j), 2014-01-01
Supplement: c4ra05072j1.pdf [file c4ra05072j1.pdf]

## Supporting information

### 3D printed modules for integrated microfluidic devices

Kyoung G. Lee, Kyun Joo Park, Seunghwan Seok, Sujeong Shin, Do Hyun Kim, Jung Youn Park, Yun Seok Heo, Seok Jae Lee and Tae Jae Lee

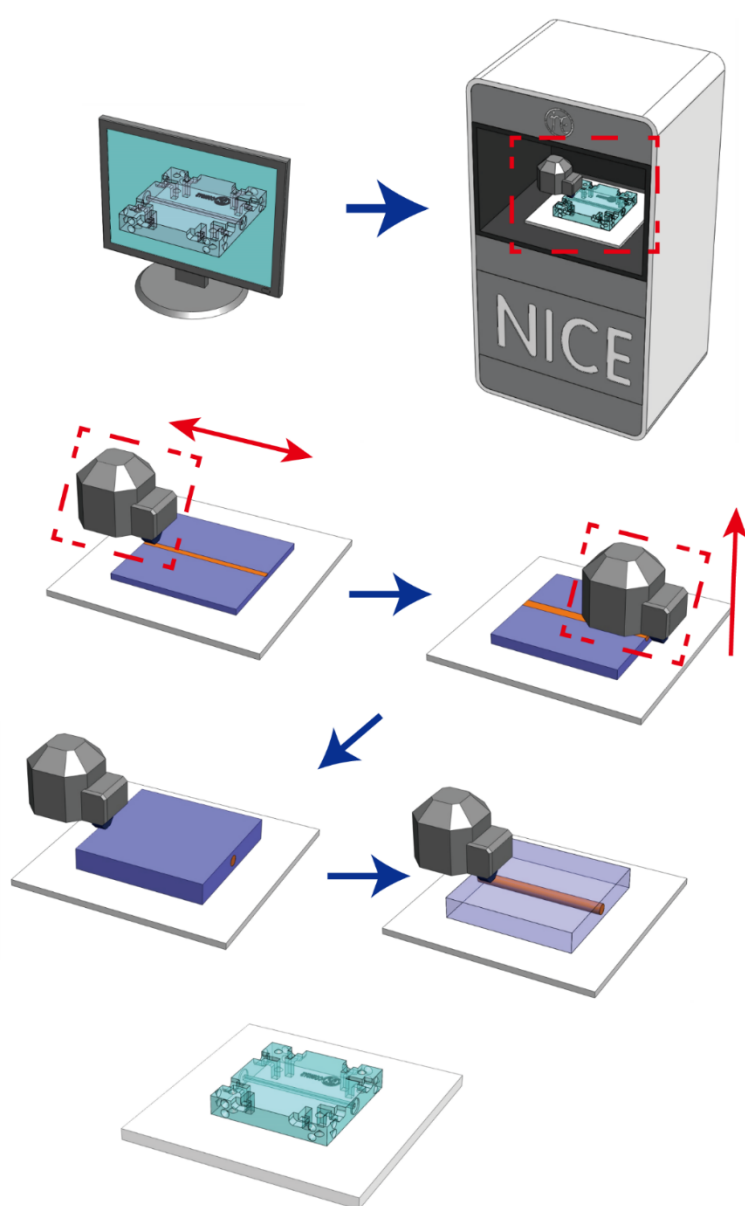

**Fig. S1.** 3D printing mechanism for module fabrication.

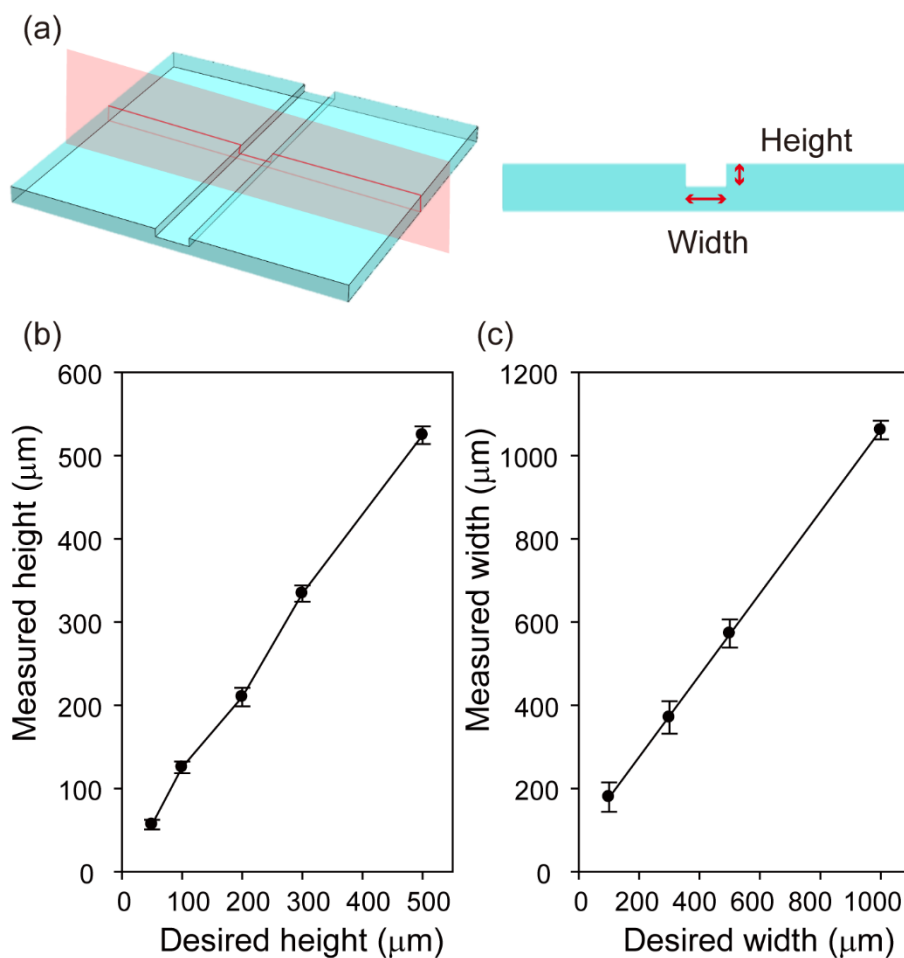

**Fig. S2.** (a) A series of height and width measurement of 3D printed modules. Dimension comparison graphs of designs and actual device of (b) height and (c) width of microchannels.

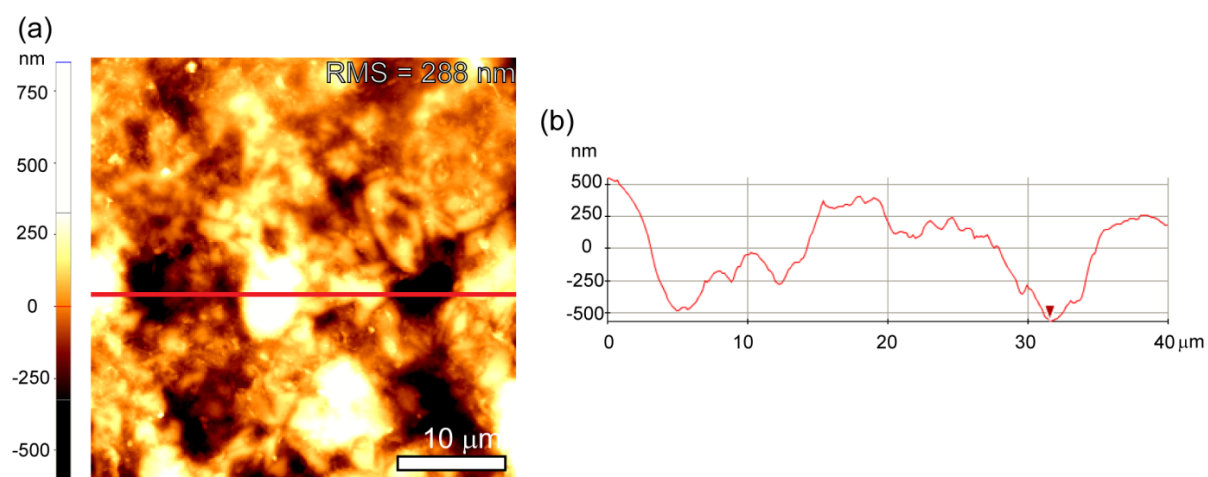

**Fig. S3.** AFM images of module surface.

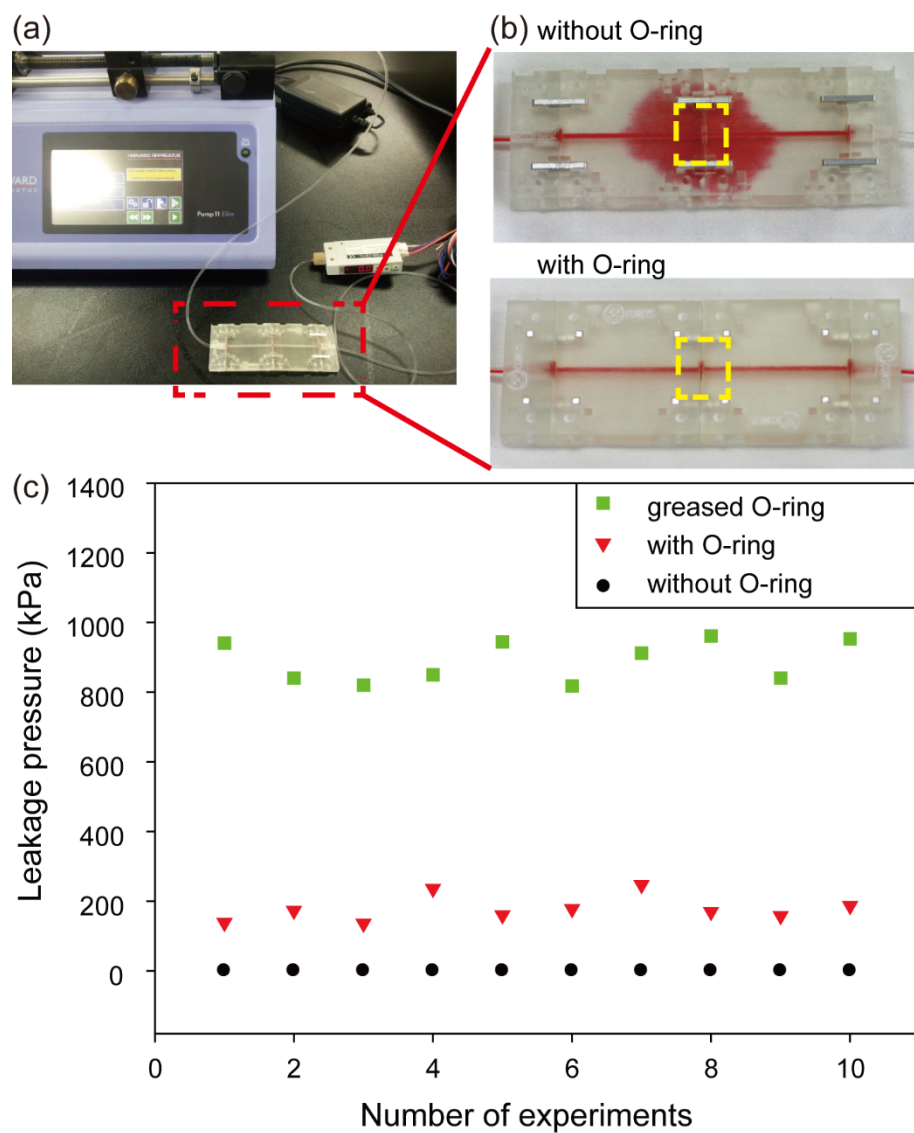

**Fig. S4.** Picture of (a) experimental setup for leakage test and (b) dye solution leakage with and without present of rubber O-ring. (c) Mechanical stability graph of modules without, with, and greased O-rings under various pressure.

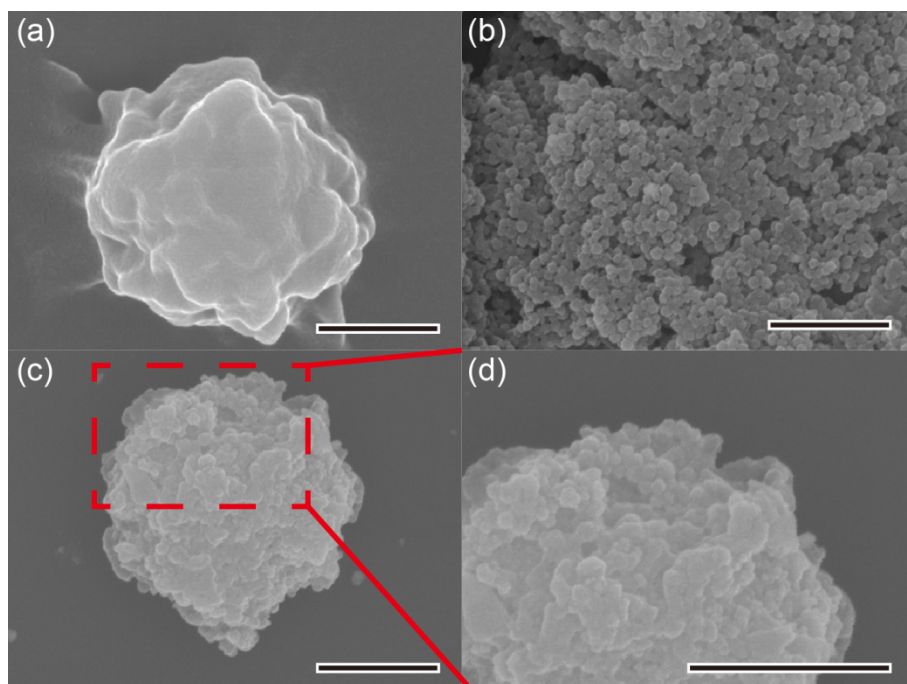

**Fig. S5.** SEM images of (a) pristine carboxylated magnetic particle, (b) pristine G-SNPs, and (c–d) antigen and antibody reacted G-SNPs–magnetic complex particles. (Scale bars are 500  $\mu\text{m}$ )

**Table S1.** Schematic diagram of various types of module components and their function and detailed dimension.

| Schematic                                                                           | Name                 | Function                        | Dimensions (mm)                               |
|-------------------------------------------------------------------------------------|----------------------|---------------------------------|-----------------------------------------------|
| 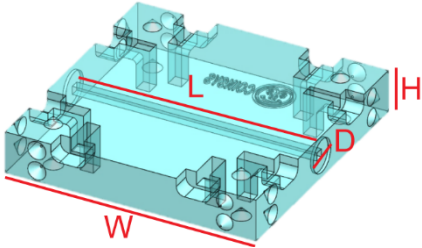   | Straight channel     | To construct a straight channel | L : 29.3<br>W : 30.0<br>H : 5.0<br>D : 4.0    |
|    | Cross channel        | To merge/divide flows           | L : 14.2                                      |
|   | T channel            | To merge/divide flows           | L1 : 29.3<br>L2 : 14.2                        |
|  | Right angled channel | To turn a flow direction        | L : 14.2                                      |
|  | Y-shaped channel     | To merge/divide flows           | L1 : 2.5<br>L2 : 2.8<br>L3 : 8.4<br>L4 : 11.9 |
|  | Ψ-shaped channel 1   | To merge/divide flows           | L1 : 2.3<br>L2 : 16.4                         |

---

|                                                                                     |                          |                                                            |                                                           |
|-------------------------------------------------------------------------------------|--------------------------|------------------------------------------------------------|-----------------------------------------------------------|
| 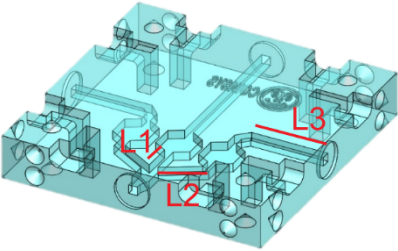   | $\Psi$ -shaped channel 2 | To merge/divide flows                                      | L1 : 3.4<br>L2 : 4.5<br>L3 : 8.9                          |
|    | Inlet/outlet             | To connect tubing into block assembly                      | D1 : 2.5<br>D2 : 4.0<br>L : 10.0                          |
|    | Mixer 1                  | To mix a solution                                          | L1 : 8.8<br>L2 : 15.0<br>L3 : 3.0<br>L4 : 5.0<br>L5 : 4.8 |
|   | Mixer 2                  | To mix a solution                                          | L1 : 3.5<br>L2 : 2.8<br>L3 : 2.5<br>L4 : 6.6              |
|  | Reactor/chamber 1        | To react/collect a solution                                | L1 : 6.2<br>L2 : 12.0<br>L3 : 6.0                         |
|  | Reactor/chamber 2        | To react/collect a solution separately                     | L1 : 6.2<br>L2 : 6.0<br>L3 : 4.0                          |
|  | Reactor/chamber 3        | To react/collect a solution with a relatively large volume | L1 : 5.2<br>L2 : 19.0<br>L3 : 9.0                         |

---

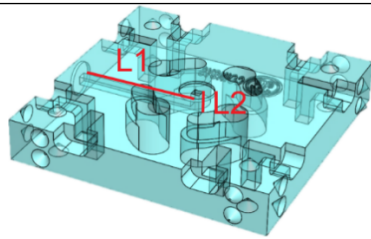

Z axis connector

To connect two blocks in multi-layer

L1 : 14.2  
L2 : 1.2

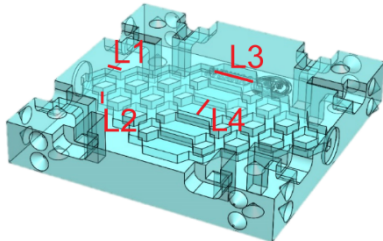

Gradient generator

To provide concentration gradient with reactor/ chamber

L1 : 2.0  
L2 : 1.0  
L3 : 5.4  
L4 : 3.4

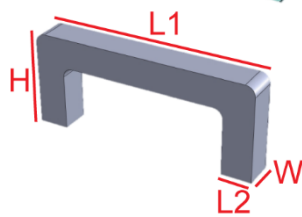

Horseshoe pin

To horizontal connect two blocks

L1 : 11.5  
L2 : 1.5  
H : 4.8  
W : 1.5

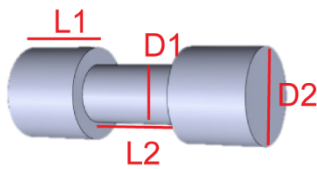

Dumbbell pin

To vertical connect two blocks

L1 : 3.0  
L2 : 4.0  
D1 : 2.2  
D2 : 3.5

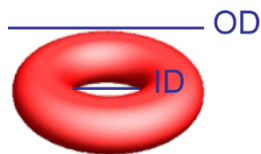

O-ring

To tight connect between two blocks

OD : 3.8  
ID : 1.0



**Table S2.** SEM images of 3D printing microchannel with different height and width. (H : height, W : width, All the scale bars are 100  $\mu\text{m}$ )

| Image                                                                               | Designed dimension ( $\mu\text{m}$ ) | Measured dimension ( $\mu\text{m}$ ) |
|-------------------------------------------------------------------------------------|--------------------------------------|--------------------------------------|
| 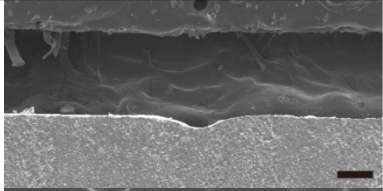   | H : 50<br>W : 100                    | H : 51<br>W : 114                    |
|    | H : 50<br>W : 300                    | H : 60<br>W : 295                    |
|    | H : 50<br>W : 500                    | H : 57<br>W : 505                    |
|   | H : 50<br>W : 1000                   | H : 58<br>W : 1021                   |
|  | H : 100<br>W : 100                   | H : 120<br>W : 171                   |
|  | H : 100<br>W : 300                   | H : 125<br>W : 372                   |
|  | H : 100<br>W : 500                   | H : 126<br>W : 582                   |
|  | H : 100<br>W : 1000                  | H : 130<br>W : 1089                  |



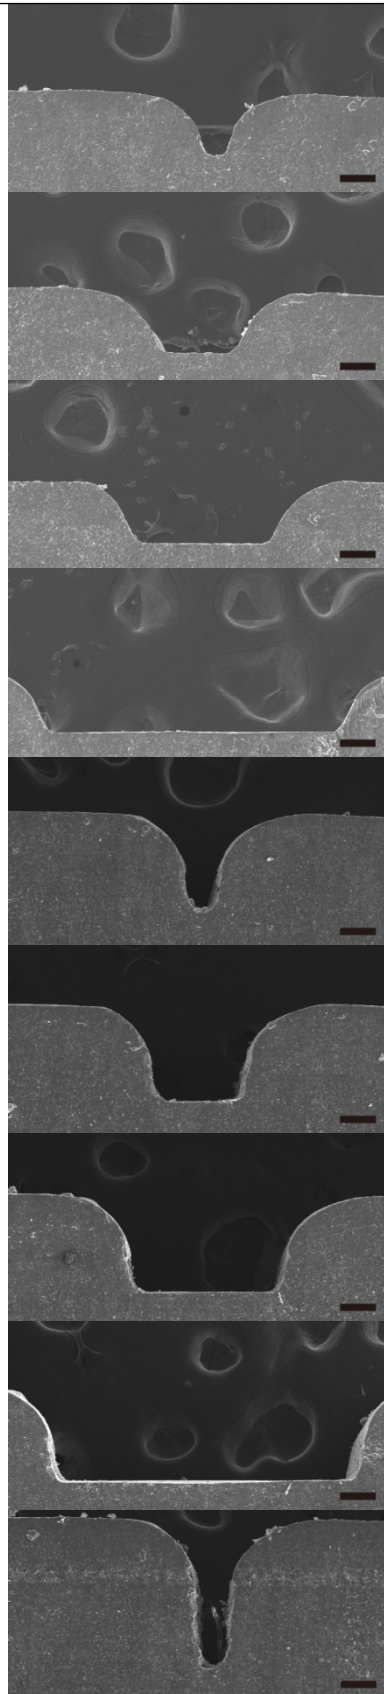

H : 200  
W : 100

H : 204  
W : 199

H : 200  
W : 300

H : 217  
W : 384

H : 200  
W : 500

H : 216  
W : 592

H : 200  
W : 1000

H : 203  
W : 1069

H : 300  
W : 100

H : 335  
W : 206

H : 300  
W : 300

H : 341  
W : 401

H : 300  
W : 500

H : 335  
W : 595

H : 300  
W : 1000

H : 326  
W : 1069

H : 500  
W : 100

H : 514  
W : 207

|                                                                                   |                     |                     |
|-----------------------------------------------------------------------------------|---------------------|---------------------|
| 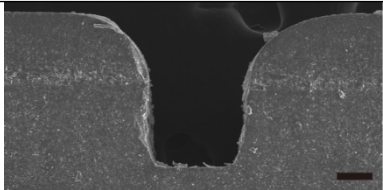 | H : 500<br>W : 300  | H : 524<br>W : 400  |
|  | H : 500<br>W : 500  | H : 536<br>W : 589  |
|  | H : 500<br>W : 1000 | H : 524<br>W : 1059 |

**Table S3.** Chemical resistance of rubber O-ring and UV resins for fabrication of functional modules.

| Solvents      | Rubber O-ring | UV resin (VisiJet Crystal ) |
|---------------|---------------|-----------------------------|
| HCl (4 wt%)   | Unaffected    | Unaffected                  |
| NaOH (10 wt%) | Unaffected    | Unaffected                  |
| Acetone       | Unaffected    | Affected                    |
| Toluene       | Unaffected    | Affected                    |
| Ethanol       | Unaffected    | Unaffected                  |
| Water         | Unaffected    | Unaffected                  |
